# Supplementary material
Source: Research Square preprint supplement (doi:10.21203/rs.3.rs-8319563/v1)
Supplement: Supplementary file 1 [file ee2b8237128f7e06e065ce4e.xlsx]

## Sheet: AGS
Study ID	ASAP3 in gastric cancer
Inoculation date	2024-11-15
Body Weight (g)
Group	Animal No.	2024-11-15	2024-11-22	2024-11-26	2024-11-29	2024-12-03	2024-12-06	2024-12-10	2024-12-13	2024-12-17	2024-12-20	2024-12-24	2024-12-27	2024-12-31	2025-01-03	2025-01-07	2025-01-10	2025-01-14	2025-01-17	2025-01-21
		0	7	11	14	18	21	25	28	32	35	39	42	46	49	53	56	60	63	67
G1 AGS-GL186 1E+7 200μl	367	18.52	18.97	18.04	18.56	18.99	19.18	19.63	20.04	20.47	21.57	22.37	22.89	23.64	23.68	23.59	23.65	22.85	21.51	18.04
	368	21.17	21.56	21.68	22.12	21.67	21.25	21.59	21.79	21.91	22.37	22.88	23.81	24.54	24.6	24.5	25.66	23.81	23.47	22.32
	369	19.33	19.21	18.76	19.01	19.11	18.23	18.86	19.07	18.97	19.49	19.91	20.65	20.77	20.95	20.42	20.3	20.33	19.46	19.81
	370	18.41	18.64	18.23	18.69	18.45	18.8	19.8	19.85	20.07	20.75	20.61	21.16	21.71	21.39	21.64	22.81	23.07	23.29	23.47
	371	17.92	18.57	17.68	18.14	18.41	18.47	18.94	18.86	19.66	19.83	20.88	21.57	21.85	22.2	21.34	21.51	19.99	21.54	23.67
	372	19.31	20.06	19.29	20.33	20.02	20.31	21.05	20.87	20.71	20.14	22.17	21.58	22.93	22.75	22.79	23.69	22.9	22.64	22.87
	Mean	19.11	19.5017	18.9467	19.475	19.4417	19.3733	19.9783	20.08	20.2983	20.6917	21.47	21.9433	22.5733	22.595	22.38	22.9367	22.1583	21.985	21.6967
	SEM	0.468551	0.466429	0.593406	0.610436	0.505361	0.479184	0.455627	0.451339	0.409084	0.450277	0.476424	0.480913	0.567255	0.563777	0.621756	0.763683	0.648899	0.609277	0.926188
	SD	1.14771	1.14251	1.45354	1.49526	1.23788	1.17376	1.11605	1.10555	1.00205	1.10295	1.167	1.17799	1.38948	1.38097	1.52298	1.87063	1.58947	1.49242	2.26869
G2 AGS-H36342 1E+7 200μl	361	17.4	18.46	18.51	18.93	19.27	17.85	19.82	19.89	20.48	20.28	20.71	21.43	21.21	21.6	21.44	22.18	22.43	19.87	20.57
	362	19.44	19.54	19.48	20.71	20.35	21.17	21.44	21.76	21.36	21.92	22.1	22.47	22.84	22.92	21.89	23.06	22.77	22.38	22.61
	363	16.8	16.87	16.37	16.73	17.23	18.2	18.34	18.74	18.64	18.68	18.88	19.24	19.93	20.04	19.69	20.09	20.5	20.38	18.64
	364	19.01	19.21	19.67	20.09	19.67	20.03	19.93	20.49	20.62	20.74	21.7	21.64	22.19	22.56	22.3	23.17	23.73	23.38	23.79
	365	17.43	17.83	17.71	18.48	18.7	18.62	18.6	19.07	18.6	18.69	18.79	19.28	19.37	19.12	19.38	20.06	19.95	20.25	20.32
	366	19.58	20.64	19.85	20.07	20.63	21.08	21.44	21.67	21.61	21.59	22.42	22.64	23.27	23.14	23.67	23.16	22.77	22.94	22.4
	Mean	18.2767	18.7583	18.5983	19.1683	19.3083	19.4917	19.9283	20.27	20.2183	20.3167	20.7667	21.1167	21.4683	21.5633	21.395	21.9533	22.025	21.5333	21.3883
	SEM	0.49179	0.543822	0.555424	0.592038	0.505097	0.598684	0.54373	0.521338	0.534792	0.568546	0.654531	0.616964	0.645096	0.673586	0.66355	0.612893	0.600343	0.628478	0.766992
	SD	1.20464	1.33209	1.36051	1.45019	1.23723	1.46647	1.33186	1.27701	1.30997	1.39265	1.60327	1.51125	1.58016	1.64994	1.62536	1.50128	1.47053	1.53945	1.87874
Tumor Volume (mm3)
Group	Animal No.	2024-11-22	2024-11-26	2024-11-29	2024-12-03	2024-12-06	2024-12-10	2024-12-13	2024-12-17	2024-12-20	2024-12-24	2024-12-27	2024-12-31	2025-01-03	2025-01-07	2025-01-10	2025-01-14	2025-01-17	2025-01-21
		7	11	14	18	21	25	28	32	35	39	42	46	49	53	56	60	63	67
G1 AGS-GL186 1E+7 200μl	367	36.6841	49.0729	73.4242	76.2205	60.0194	58.9824	59.904	33.0223	85.9694	95.1457	104.875	121.581	175.116	182.1	352.648	663.513	1019.95	1031.07
	368	39.8279	64.074	77.1352	81.8231	61.9143	62.0305	37.4709	33.4018	62.8571	82.4119	120.058	138.277	159.477	258.157	313.537	612.307	645.178	722.342
	369	19.1056	57.8902	61.9174	65.8093	49.8285	47.9163	32.9281	28.2656	56.6319	70.7163	108.085	124.616	136.671	249.93	283.621	535.491	547.422	568.951
	370	25.866	56.2934	71.3768	77.6798	47.4534	51.6639	36.2758	25.7124	43.8919	67.7561	93.0231	147.42	163.136	219.796	362.028	672.607	1016.36	1131.15
	371	35.0407	61.114	82.8414	111.928	78.855	47.229	41.2252	0	46.4371	62.029	79.8243	114.831	129.053	237.385	255.656	472.395	740.243	766.179
	372	32.156	51.0483	64.3332	73.7069	53.2137	43.9172	42.0117	37.4399	70.924	79.3234	96.3831	118.763	123.585	126.556	255.572	413.338	474.707	802.23
	Mean	31.4467	56.5821	71.838	81.1946	58.5474	51.9565	41.636	26.307	61.1186	76.2304	100.375	127.581	147.84	212.321	303.844	561.608	740.644	836.987	#DIV/0!
	SEM	3.13337	2.34857	3.1969	6.51871	4.66707	2.91112	3.89845	5.52455	6.45282	4.86301	5.65519	5.1417	8.52333	20.3866	19.0809	43.1667	95.0795	84.7367	#DIV/0!
	SD	7.67516	5.75279	7.83076	15.9675	11.4319	7.13075	9.5492	13.5323	15.8061	11.9119	13.8523	12.5945	20.8778	49.9367	46.7385	105.736	232.896	207.562	#DIV/0!
G2 AGS-H36342 1E+7 200μl	361	32.4999	50.4814	72.2561	88.2761	52.3167	59.5584	71.3975	47.6672	85.7555	92.2625	111.584	159.071	204.276	255.242	339.207	748.702	759.928	772.13
	362	42.5503	54.3782	62.2205	66.2343	42.5903	38.5641	38.1356	0	41.9953	62.0197	107.333	125.211	178.1	132.618	140.899	327.156	455.405	578.938
	363	34.5273	50.2764	60.8338	68.2694	38.9069	37.5451	0	0	59.648	73.8381	86.5616	102.465	163.719	158.438	194.293	284.621	358.352	461.059
	364	15.1838	40.8854	52.2959	57.2998	39.5507	25.7124	0	0	25.0776	49.1063	74.5948	95.9498	125.891	144.589	215.99	418.01	524.827	843.083
	365	29.883	53.6183	67.2594	71.9388	46.575	37.0293	24.6502	0	50.4106	62.4218	78.0644	102.838	163.012	169.845	231.746	372.728	430.314	772.527
	366	31.8392	51.2453	59.0438	62.8281	49.9523	38.4949	30.3958	0	59.648	66.1568	69.1508	82.7764	150.949	189.638	315.795	488.111	596.976	903.31
	Mean	31.0806	50.1475	62.3183	69.1411	44.982	39.484	27.4298	7.94453	53.7558	67.6342	87.8815	111.385	164.325	175.062	239.655	439.888	520.967	721.841	#DIV/0!
	SEM	3.65224	1.97539	2.80807	4.33303	2.25954	4.48794	10.9073	7.94453	8.2973	5.91383	7.22421	11.0671	10.7146	17.9583	30.6272	68.1903	58.268	68.5948	#DIV/0!
	SD	8.94612	4.8387	6.87834	10.6137	5.53471	10.9932	26.7173	19.4601	20.3242	14.4859	17.6956	27.1088	26.2453	43.9886	75.021	167.031	142.727	168.022	#DIV/0!

## Sheet: HGC-27
Study ID	ASAP3 in gastric cancer
Inoculation date	2024-10-24										BWL > 10%
											BWL > 15%
											BWL > 20%
Body Weight (g)										Body Weight (% Change)
Group	Animal No.	2024-10-24	2024-10-31	2024-11-04	2024-11-07	2024-11-11	2024-11-14			2024-10-24	2024-10-31	2024-11-04	2024-11-07	2024-11-11	2024-11-14
		0	7	11	14	18	21			0	7	11	14	18	21
G1 HGC27-GL401 1E+7 200μl	268	17.36	18.46	19.06	19.93	20.6	21.78			0	6.33641	9.79263	14.8041	18.6636	25.4608
	269	18.21	18.48	18.89	19.81	20.1	22.29			0	1.4827	3.73421	8.78638	10.3789	22.4053
	270	18.33	18.47	18.66	19.5	19.52	21.02			0	0.763775	1.80033	6.38298	6.49209	14.6754
	271	17.37	18.22	18.61	19.75	19.43	21.29			0	4.89349	7.13874	13.7018	11.8595	22.5676
	272	16.62	16.88	17.66	18	18.21	19.8			0	1.56438	6.25752	8.30325	9.56679	19.1336
	273	18.51	18.77	18.9	19.69	19.95	21.11			0	1.40465	2.10697	6.37493	7.77958	14.0465
	Mean	17.7333	18.2133	18.63	19.4467	19.635	21.215			0	2.7409	5.1384	9.72558	10.7901	19.7149
	SEM	0.299852	0.276015	0.205556	0.295101	0.333294	0.343111			0	0.934936	1.28088	1.4934	1.7544	1.882
	SD	0.734484	0.676097	0.503508	0.722846	0.816401	0.840446			0	2.29012	3.1375	3.65806	4.29738	4.60994
G2 HGC27-Y32447 1E+7 200μl	274	16.82	17.28	17.59	17.84	18.58	19.79			0	2.73484	4.57788	6.06421	10.4637	17.6576
	275	17.2	17.84	19.19	19.39	21.27	22.65			0	3.72093	11.5698	12.7326	23.6628	31.686
	276	15.87	16.31	16.49	17.25	18.22	16.8			0	2.77253	3.90674	8.69565	14.8078	5.86011
	277	18.76	19.35	18.77	18.63	19.22	20.93			0	3.14499	0.0533049	-0.692964	2.45203	11.5672
	278	17.19	17.89	18.61	18.28	19.06	20.78			0	4.07213	8.26062	6.3409	10.8784	20.8842
	279	16.13	17.91	18.35	19.08	18.98	20			0	11.0353	13.7632	18.2889	17.6689	23.9926
	Mean	16.995	17.7633	18.1667	18.4117	19.2217	20.1583			0	4.58013	7.02191	8.57154	13.3223	18.6079
	SEM	0.417921	0.404423	0.39938	0.323784	0.43571	0.788025			0	1.30892	2.09683	2.6385	2.9458	3.73361
	SD	1.02369	0.990629	0.978277	0.793106	1.06727	1.93026			0	3.20619	5.13617	6.46297	7.21571	9.14544
Tumor Volume (mm3)		注:瘤体积计算方式为：肿瘤体积(mm3)=0.5×(肿瘤长径×肿瘤短径2)								% Tumor Growth
Group	Animal No.	2024-10-31	2024-11-04	2024-11-07	2024-11-11	2024-11-14				2024-10-31	2024-11-04	2024-11-07	2024-11-11	2024-11-14
		7	11	14	18	21				7	11	14	18	21
G1 HGC27-GL401NC 1E+7 200μl	268	57.6089	97.4061	233.291	511.631	972.774				0	69.0818	304.957	788.111	1588.58
	269	56.2071	99.7443	193.015	502.301	1115.88				0	77.4587	243.4	793.662	1885.3
	270	60.1389	127.048	179.507	423.164	691.18				0	111.257	198.487	603.643	1049.31
	271	49.8658	87.45	136.328	264.279	353.525				0	75.3708	173.39	429.981	608.953
	272	55.5171	106.74	128.51	242.466	714.971				0	92.2649	131.479	336.741	1187.84
	273	43.8555	74.263	109.425	319.739	507.675				0	69.3358	149.513	629.075	1057.61
	Mean	53.8655	98.7752	163.346	377.263	726.001				0	82.4615	200.204	596.869	1229.6
	SEM	2.43432	7.29083	19.0479	48.3186	115.563				0	6.71289	26.3652	75.6972	183.289
	SD	5.96285	17.8588	46.6577	118.356	283.07				0	16.4432	64.5813	185.42	448.965
G2 HGC27-Y32447 1E+7 200μl	274	59.5911	159.048	220.814	1039.26	1437.01				0	166.899	270.548	1643.98	2311.45
	275	61.6053	181.331	529.342	1130.93	1572.56				0	194.343	759.247	1735.76	2452.63
	276	60.873	119.238	248.552	651.356	919.417				0	95.8805	308.313	970.026	1410.39
	277	54.289	111.973	182.458	581.27	1078.63				0	106.254	236.086	970.696	1886.83
	278	58.8062	113.628	198.214	517.725	1079.97				0	93.224	237.063	780.391	1736.48
	279	50.3424	98.8592	137.238	249.044	602.398				0	96.3736	172.61	394.7	1096.6
	Mean	57.5845	130.679	252.77	694.929	1115				0	125.496	330.645	1082.59	1815.73
	SEM	1.78707	13.1078	57.3872	135.854	143.366				0	17.8801	87.6516	210.673	211.673
	SD	4.3774	32.1074	140.569	332.772	351.173				0	43.7971	214.702	516.042	518.492
